# Supplementary material
Source: PubMed Central journal article supplement (PMC3018561)
Supplement: NIHMS260312-supplement-01.pdf [file NIHMS260312-supplement-01.pdf]

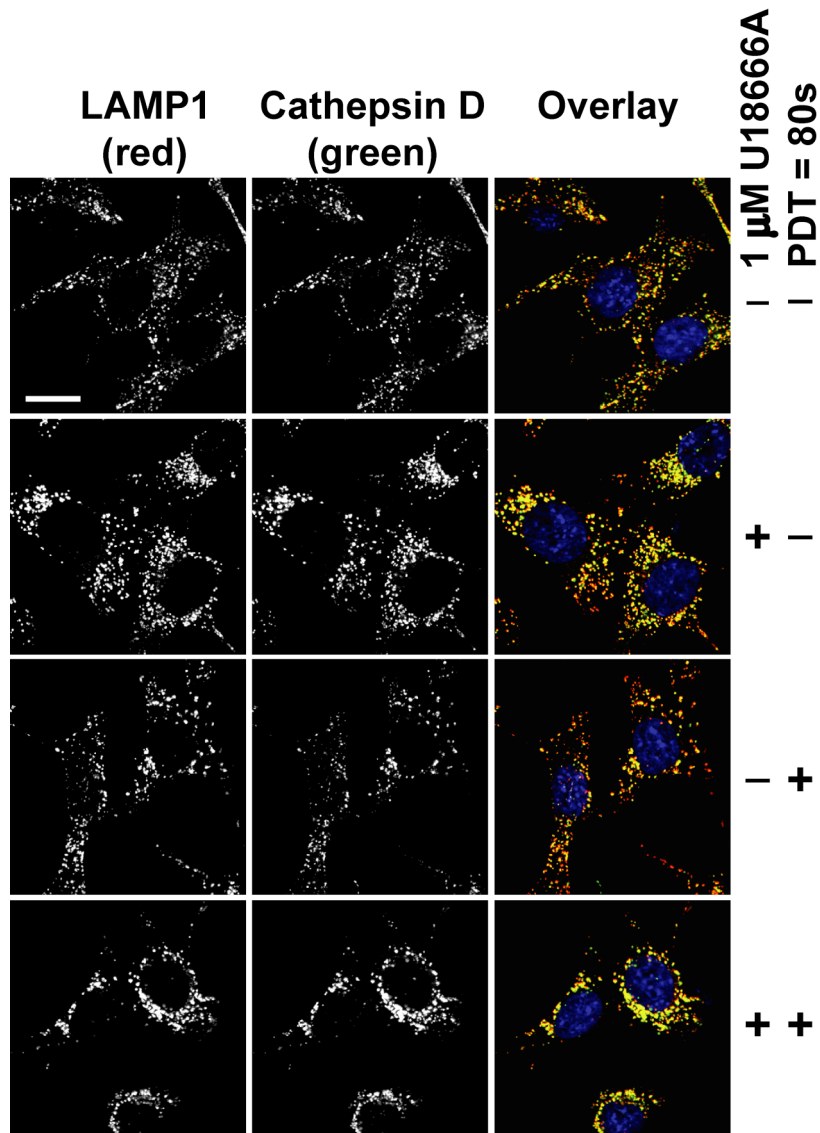

**Supplementary Figure 1.** U18666A pretreatment suppresses NPe6 PDT-induced LMP. 1c1c7 cultures were treated with nothing or 1  $\mu$ M U18666A for ~22 h prior to being washed and refed with fresh media ( $\pm$  33  $\mu$ M NPe6 for 1 h) and subsequently photoirradiated for 80 s. Cultures were washed and fixed for subsequent immunocytochemical analyses ~4 h after photoirradiation. Co-localization of cathepsin D (green) and LAMP1 (red) is indicated by orange-yellow punctate spots. Pictures are representative of what was observed in multiple fields of cells from 2 independent experiments. The white bar represents 20 microns.

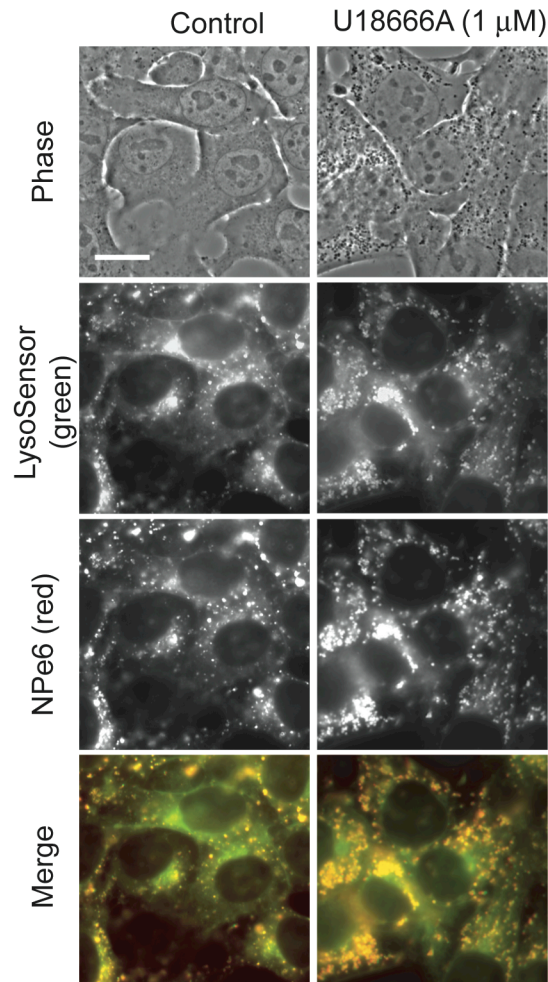

**Supplementary Figure 2.** Pretreatment with U18666A does not alter NPe6 localization. 1c1c7 cultures were left untreated, or incubated with 1  $\mu$ M U18666A for 22 h prior to being incubated with 33  $\mu$ M NPe6 for ~2 h, at the end of which 1.5  $\mu$ M LysoSensor Green was added. After an additional 10-15 min of incubation the cultures were washed, refed, and immediately viewed by phase and fluorescent microscopy. For the purposes of colocalization, NPe6 fluorescence was assigned a 'red' color, and LysoSensor Green was assigned a 'green' color. Exposure times for NPe6 and LysoSensor Green fluorescence acquisition in U18666A-treated cultures were 1/4 and 1/3, respectively, of the times used for control cultures. White bar represents 20 microns.
